# Supplementary material for: The investigation of the specific behavior of a cationic block structure and its excellent flocculation performance in high-turbidity water treatment
Source: PubMed Central journal article supplement — RSC Adv. 2018 Apr 20;8(27):15119–33. doi: 10.1039/c8ra02006j (PMC9079996; doi:10.1039/c8ra02006j), 2018-04-20
Supplement: RA-008-C8RA02006J-s001.pdf [file RA-008-C8RA02006J-s001.pdf]

## Cover Page for Supporting Information

**Manuscript title:** The investigation of the specific behavior for the cationic block structure and its excellent flocculation performance in high turbidity water treatment

Li Feng<sup>a,b</sup>, Huaili Zheng<sup>a,b\*</sup>, Baoyu Gao<sup>c</sup>, Shuang Liu<sup>a,b</sup>, Shixin Zhang<sup>a,b</sup>,

Moxi Wang<sup>a,b</sup>, Jianjun Liang<sup>a,b</sup>

a. State Key Laboratory of Coal Mine Disaster Dynamics and Control, Chongqing University, Chongqing 400044, China

b. Key Laboratory of the Three Gorges Reservoir Region's Eco-Environment, Ministry of Education, Chongqing University, Chongqing 400045, China

c. Chongqing Key Laboratory of Catalysis and Environmental New Materials, College of Environment and Resources, Chongqing Technology and Business University, Chongqing 400067, P. R. China

\*Corresponding author. Tel.: +86 23 65120827. Fax: +86 23 65120827.

E-mail address: hlz6512@163.com (Huaili Zheng)

This file contains 2 Texts.

### Contents:

**Text S1.** Analytical methods for  $K_M$ ,  $R_p$  and  $C_v$ .

The dialysis and conductometric titration methods were used to determine the  $K_M$  and  $R_p$ , and the  $K_M$  was calculated by the following Formula (1):

$$K_M = \frac{[NaPAA]_{****} [ATAC]}{[NaPAA]_f [ATAC]_f}$$

(1)

In Formula (1),  $[NaPAA^{*}ATAC]$  referred to the concentration of the association of NaPAA and ATAC,  $[NaPAA]_f$  and  $[ATAC]_f$  were the free concentration when the dialysis kept balance. Meanwhile, the free concentration of NaPAA and ATAC was measured by conductometric titration method. Prior to the determination of polymerization rate ( $R_p$ ), the monomer conversion rate was controlled to less than 10%, and the  $R_p$  was calculated by the following Formula (2):

$$R_p = k \times [M] \quad (2)$$

In Formula (2),  $[M]$  referred to the initial concentration of monomer, and  $k$  was the slope of the  $Y_t = \ln[1/(1-C_t)]$  plot (a fitting straight line), where  $C_t$  is the monomer conversion ( $C$ ) with a given reaction time at 2 min, 4 min, 6 min, 8 min and 10 min, and it was determined by gravimetric method.<sup>1</sup>

$$Conversion = \frac{m_0 \cdot m_2}{m \cdot m_1} \quad (3)$$

where  $m$  is the total weight of the monomers (AM and ATAC) for the copolymerization,  $m_0$  is the weight of the obtained product after copolymerization,  $m_1$  is the copolymerization weight used for purification, and  $m_2$  is the copolymerization weight after purification.

**Text S2.** Analytical method for Fractal dimension ( $D_f$ )

Fractal dimension ( $D_f$ ) could be determined by the light scattering method from the negative slope of log-log plot by a well-known power-law relation:<sup>2,3</sup>

$$I \propto Q^{D_f} \quad (4)$$

where  $I$  is the light intensity, and  $Q$  is the scatter vector which can be given according to the following equation:

$$\frac{4\pi n \sin(\theta/2)}{\lambda} \quad (5)$$

where  $\lambda$  is the wavelength of radiation in vacuum (635 nm in this work),  $n$  is the refractive index of the dispersion medium (1.33 for water), and  $\theta$  is the scattering angle, respectively.

## References

- 1 P. Jarvis, B. Jefferson and S. A. Parsons, *Environ Sci Technol*, 2005, **39**, 2307-2314.
- 2 H. Shang, J. Liu, Y. Zheng and L. Wang, *J Appl Polym Sci*, 2010, **111**, 1594-1599.
- 3 J. Greenwood, T. Rainey and W. O. S. Doherty, *Journal of Colloid & Interface Science*, 2007, **306**, 66-71.
